# Supplementary material for: 18F-labeled Pyrazolo[1,5-a]pyrimidine Derivatives: Synthesis from 2,4-Dinitrobenzamide and Tosylate Precursors and Comparative Biological Evaluation for Tumor Imaging with Positron Emission Tomography
Source: MDPI journal article supplement (doi:10.3390/molecules17043774), 2012-03-27

**Figure S1.** The HPLC chromatogram of [ $^{19}\text{F}$ ]3 (**A**) and the radiochromatogram of [ $^{18}\text{F}$ ]3 (**B**). The retention time of [ $^{19}\text{F}$ ]3 (10.9 min) was measured with a UV detector while the retention time of [ $^{18}\text{F}$ ]3 (11.3 min) was measured radiometrically.

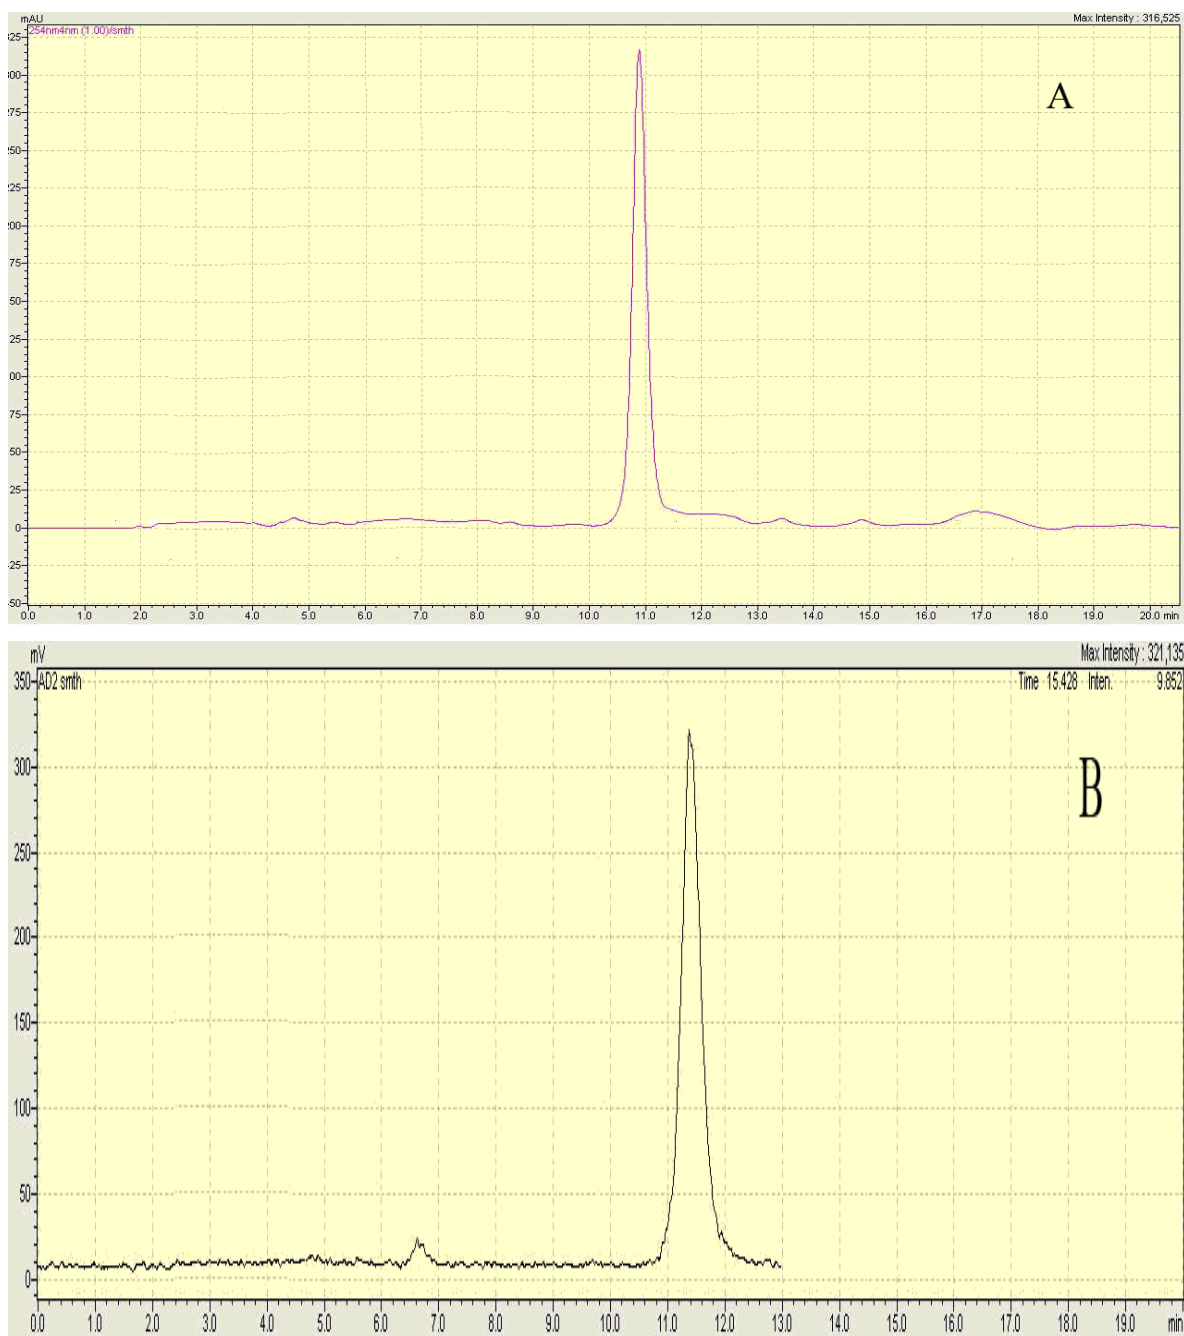

**Figure S2.** The HPLC chromatogram of [ $^{19}\text{F}$ ]4 (**A**) and the radiochromatogram of [ $^{18}\text{F}$ ]4 (**B**). The retention time of [ $^{19}\text{F}$ ]4 (5.8 min) was measured with a UV detector while the retention time of [ $^{18}\text{F}$ ]4 (6.5 min) was measured radiometrically.

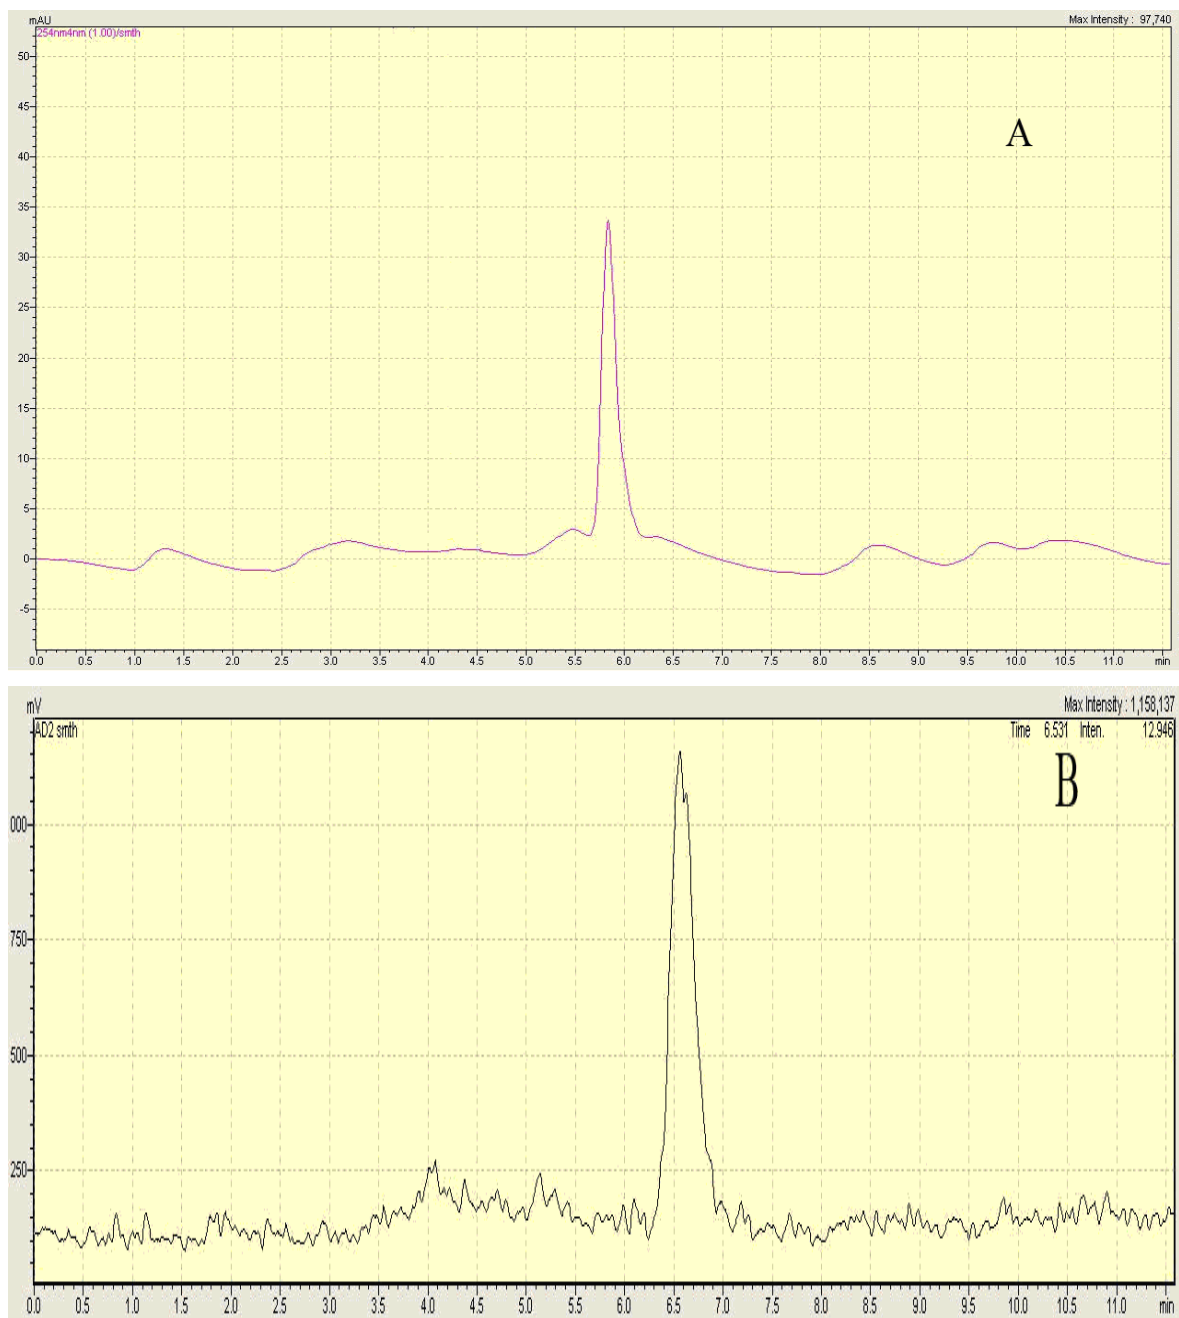

**Figure S3.** The HPLC chromatogram of [ $^{19}\text{F}$ ]5 (**A**) and the radiochromatogram of [ $^{18}\text{F}$ ]5 (**B**). The retention time of [ $^{19}\text{F}$ ]5 (2.15 min) was measured with a UV detector while the retention time of [ $^{18}\text{F}$ ]5 (2.34 min) was measured radiometrically.

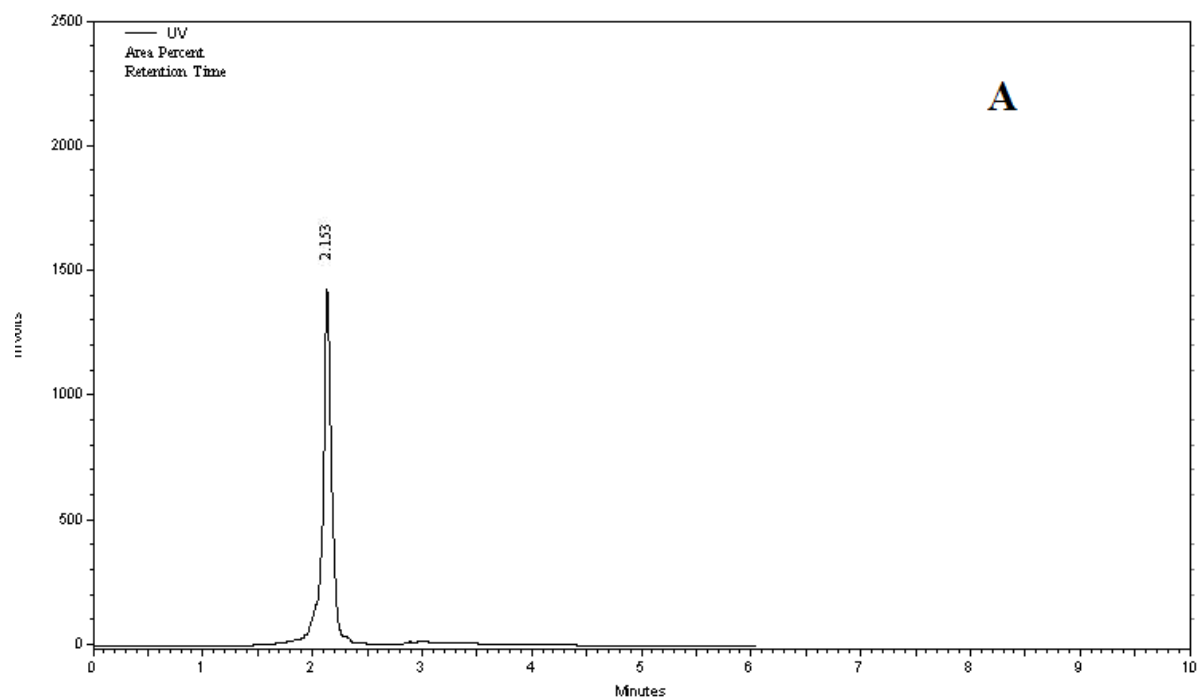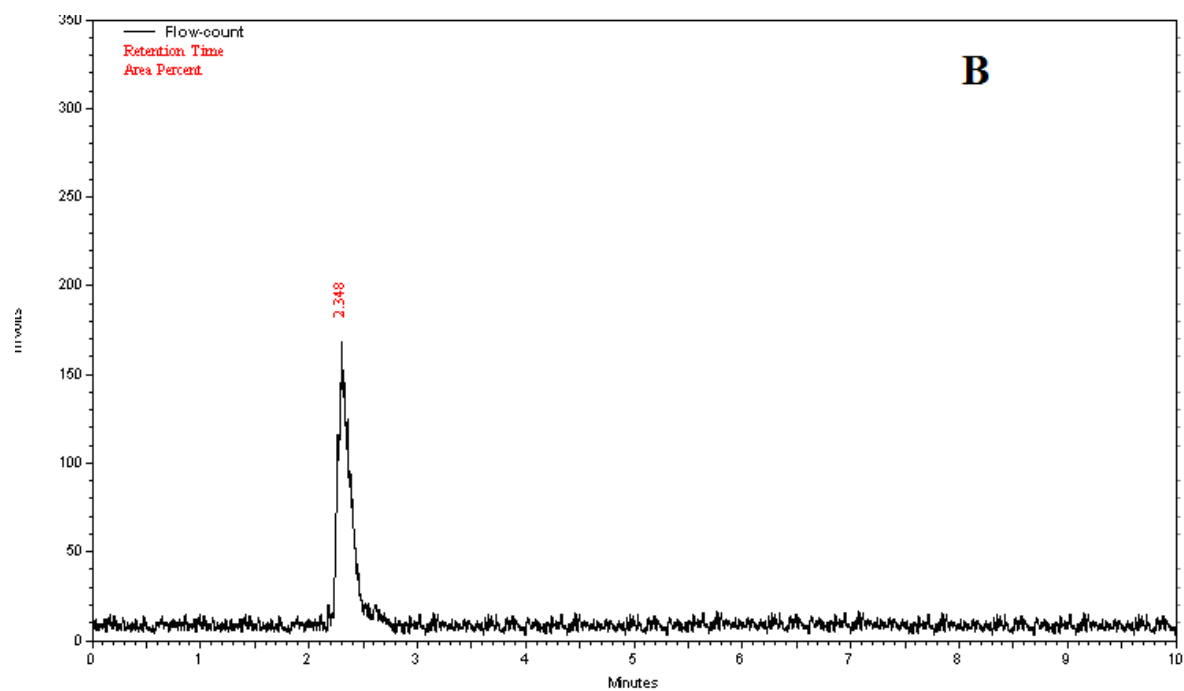

Supplement: s1 [file s1]
